# Supplementary material for: On-Site and Visual Detection of the H5 Subtype Avian Influenza Virus Based on RT-RPA and CRISPR/Cas12a
Source: MDPI journal article supplement (doi:10.3390/v16050753), 2024-05-10
Supplement: s1 [file s1]

Table S1 The detection results of RT-RPA/CRISPR and RT-qPCR assay in clinical samples.

| Number | Ct/Judge | RT-RPA/CRISPR/Judge | Virus isolation | Number | Ct/Judge | RT-RPA/CRISPR/Judge | Virus isolation |
|--------|----------|---------------------|-----------------|--------|----------|---------------------|-----------------|
| S1     | 26.346/P | 262597/P            | P               | S42    | 34.600/N | 11200/N             | P               |
| S2     | 35.629/N | 6421/N              | P               | S43    | 29.907/P | 69.04/N             | P               |
| S3     | 29.778/P | 1432471/P           | P               | S44    | 32.101/P | 30621/P             | P               |
| S4     | 27.751/P | 466241/P            | P               | S45    | 35.455/N | 5547/N              | P               |
| S5     | 34.693/P | 105884/P            | P               | S46    | 23.372/P | 906606/P            | P               |
| S6     | 31.793/P | 61936/P             | P               | S47    | 24.171/P | 965443/P            | P               |
| S7     | 10.859/P | 619727/P            | P               | S48    | 23.864/P | 696776/P            | P               |
| S8     | 25.998/P | 448527/P            | P               | S49    | 36.242/N | 2159/N              | P               |
| S9     | 20.677/P | 893843/P            | P               | S50    | 17.096/P | 849464/P            | P               |
| S10    | 30.652/P | 80363/P             | P               | S51    | 28.375/P | 7792/N              | P               |
| S11    | 28.063/P | 929154/P            | P               | S52    | 26.453/P | 904615/P            | P               |
| S12    | 31.326/P | 50958/P             | P               | S53    | 29.150/P | 9956/N              | P               |
| S13    | 20.782/P | 723319/P            | P               | S54    | 18.267/P | 942682/P            | P               |
| S14    | 35.860/N | 7460/N              | P               | S55    | 21.280/P | 1013/N              | P               |
| S15    | 22.925/P | 619727/P            | P               | S56    | 19.452/P | 702150/P            | P               |
| S16    | 21.778/P | 788743/P            | P               | S57    | -/N      | 3678/N              | P               |
| S17    | 23.189/P | 1300663/P           | P               | S58    | 36.064/N | 1150/N              | N               |
| S18    | 31.710/P | 61963/P             | P               | S59    | 35.146/N | 885/N               | N               |
| S19    | 31.849/P | 22875/P             | P               | S60    | 36.034/N | 322/N               | N               |
| S20    | 35.383/N | 33720/P             | P               | S61    | 35.583/N | 2406/N              | N               |
| S21    | 28.800/P | 170584/P            | P               | S62    | 37.171/N | 1177/N              | N               |
| S22    | 18.739/P | 803524/P            | P               | S63    | 35.858/N | 1093/N              | N               |

Table S1 (continue)

| Number | Ct/Judge | RT-RPA/CRISPR/Judge | Virus isolation | Number | Ct/Judge | RT-RPA/CRISPR/Judge | Virus isolation |
|--------|----------|---------------------|-----------------|--------|----------|---------------------|-----------------|
| S23    | 34.050/N | 43637/P             | P               | S64    | 35.114/N | 4843/N              | N               |
| S24    | 18.765/P | 1280066/P           | P               | S65    | -/N      | 778/N               | N               |
| S25    | 24.864/P | 737056/P            | P               | S66    | 17.275/P | 761806/P            | N               |
| S26    | 26.965/P | 556659/P            | P               | S67    | 37.624/N | 1347/N              | N               |
| S27    | 32.239/P | 63254/P             | P               | S68    | 35.176/N | 1951/N              | N               |
| S28    | 23.767/P | 629848/P            | P               | S69    | 35.090/N | 1177/N              | N               |
| S29    | 18.753/P | 890329/P            | P               | S70    | 37.605/N | 2927/N              | N               |
| S30    | 23.341/P | 1458743/P           | P               | S71    | 37.792/N | 836/N               | N               |
| S31    | 30.129/P | 40308/P             | P               | S72    | 37.138/N | 437/N               | N               |
| S32    | 31.267/P | 33720/P             | P               | S73    | 36.712/N | 2718/N              | N               |
| S33    | 31.609/P | 42936/P             | P               | S74    | 35.362/N | 1831/N              | N               |
| S34    | 22.473/P | 628337/P            | P               | S75    | 36.219/N | 1023/N              | N               |
| S35    | 23.730/P | 1519676/P           | P               | S76    | -/N      | 2257/N              | N               |
| S36    | 18.993/P | 1163838/P           | P               | S77    | 35.254/N | 1093/N              | N               |
| S37    | 28.758/P | 771067/P            | P               | S78    | 37.255N  | 2927/N              | N               |
| S38    | 35.875/N | 403011/P            | P               | S79    | 35.713N  | 2818/N              | N               |
| S39    | 36.938/N | 942682/P            | P               | S80    | 21.101/P | 156403/P            | N               |
| S40    | 35.677/N | 929605/P            | P               | S81    | 29.848/P | 28517/P             | N               |
| S41    | 35.094/N | 7036/N              | P               |        |          |                     |                 |

Note: “P”: Positive; “N”: Negative; “S”: Sample; S1-S57 are positive samples; S58-S81 are negative samples.
